# Supplementary material
Source: PubMed Central journal article supplement (PMC6214726)
Supplement: NIHMS1507063-supplement-6.pdf [file NIHMS1507063-supplement-6.pdf]

**A**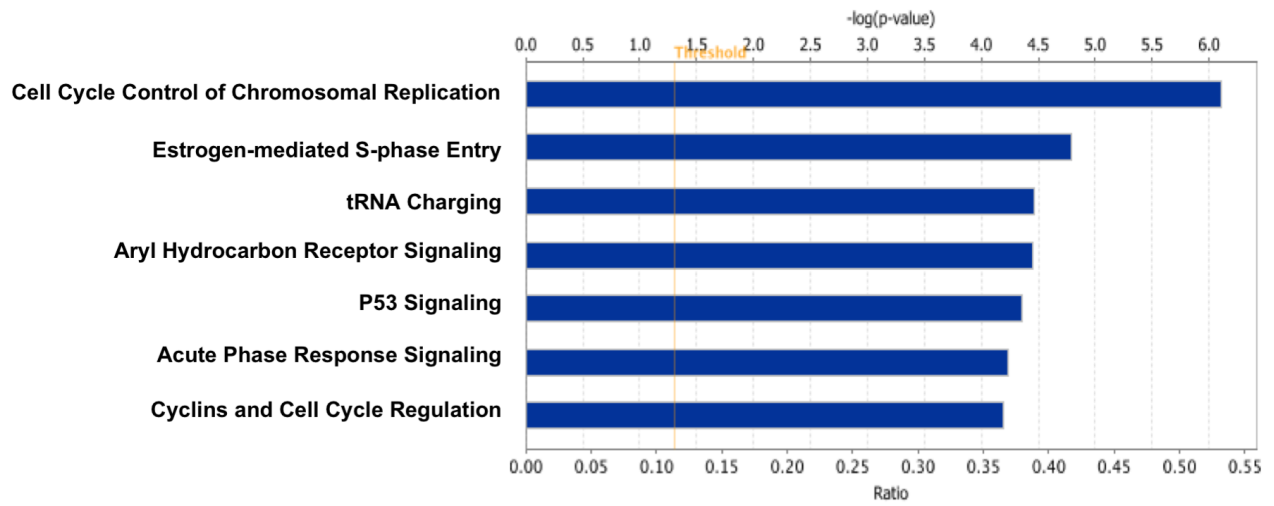**B**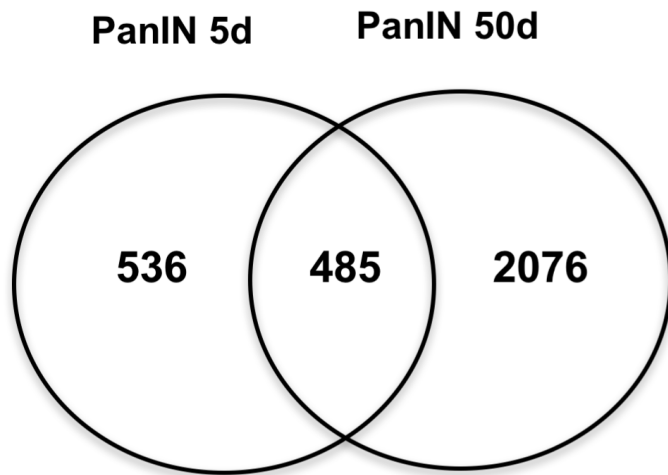**C**

**Top Analysis – Upstream and Downstream Molecules:**

**Upstream:**

SERPINB7 ↑  
 AGT ↑  
 EGR1 ↑  
 CDH5 ↑  
 MEGF10 ↑  
 MMP10 ↑

**Downstream:**

Spr1b ↓  
 PRKG1 ↓  
 Prl2c2 ↓  
 MITF ↓  
 SOWAHC ↓  
 SPRR1A ↓

**D**

**Top Diseases:**

1. Cancer
2. Organismal Injury and Abnormalities
3. Gastrointestinal Disease
4. Reproductive System Disease
5. Inflammatory Response

**Supplementary Figure S5**
