# Supplementary material
Source: PubMed Central journal article supplement (PMC6214726)

**A**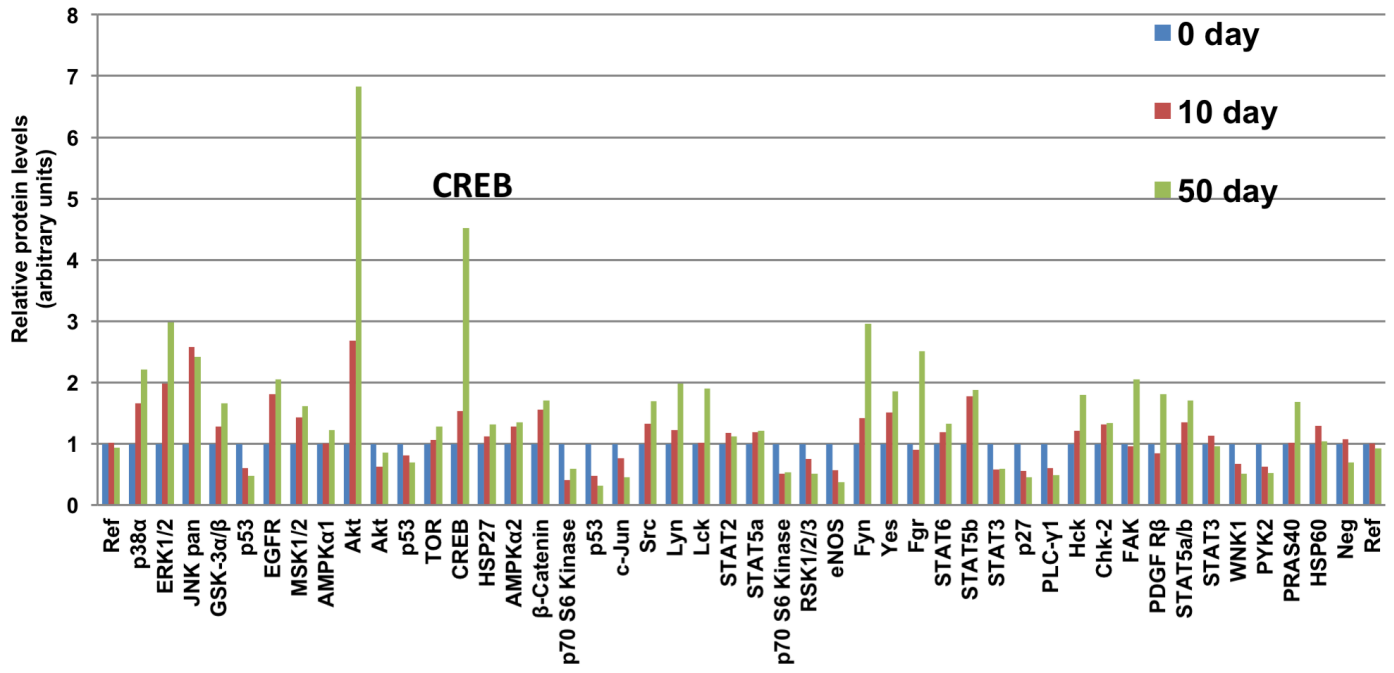**B**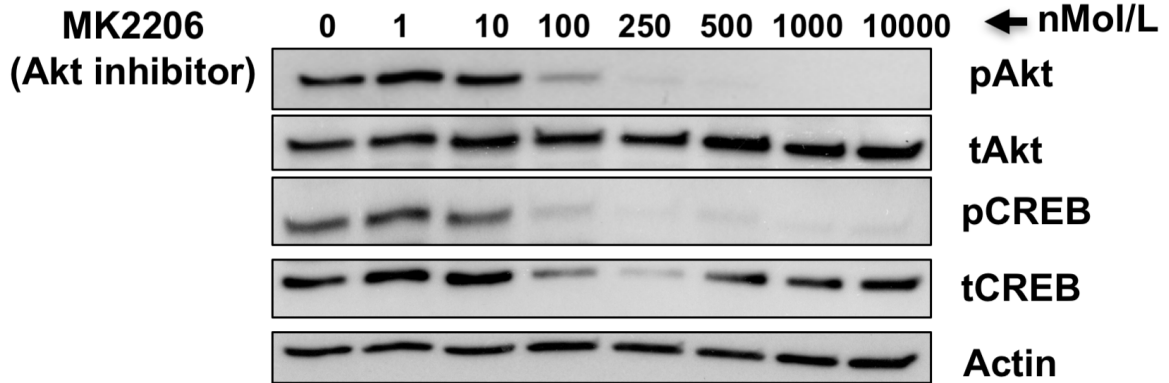

Supplementary Figure S1

Supplement: NIHMS1507063-supplement-2.pdf [file NIHMS1507063-supplement-2.pdf]

**A**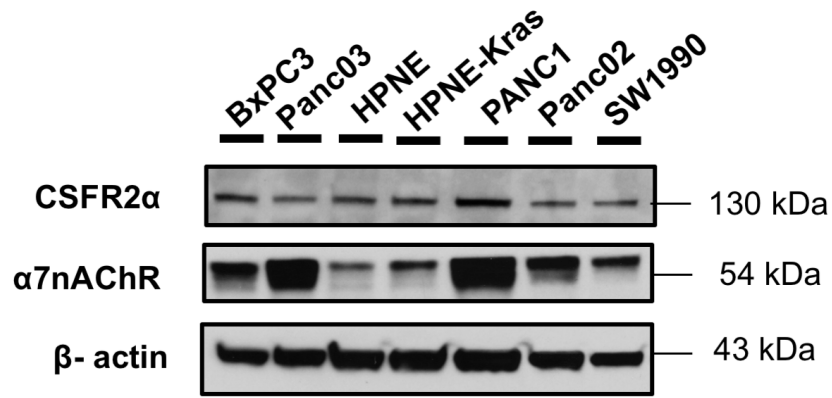**B**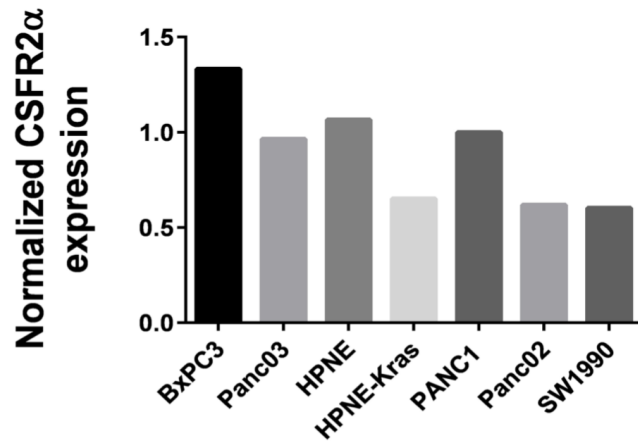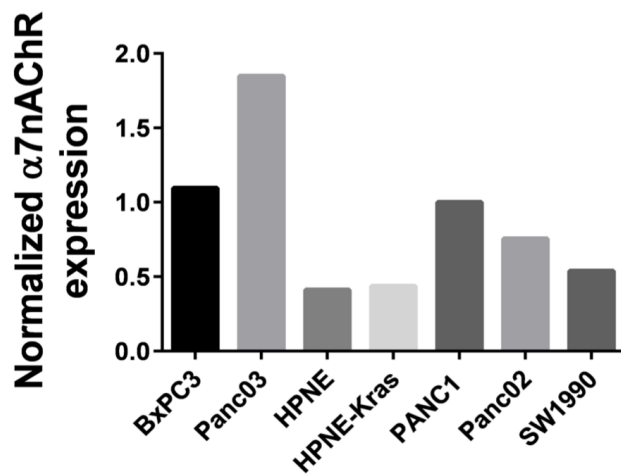

Supplementary Figure S2

Supplement: NIHMS1507063-supplement-3.pdf [file NIHMS1507063-supplement-3.pdf]

**A**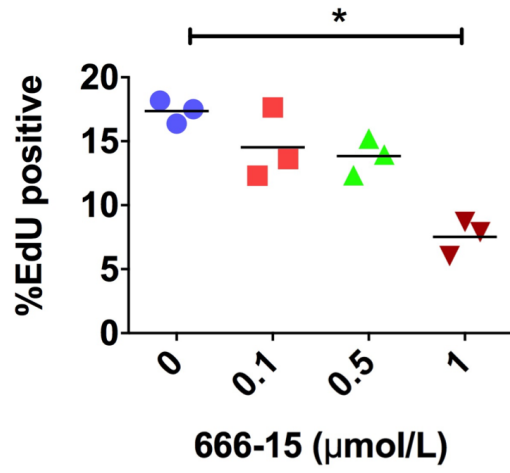**B**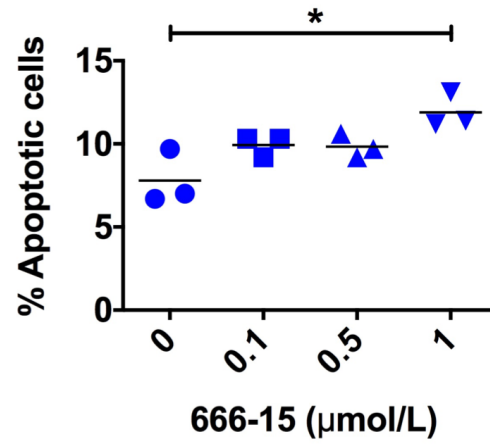**C**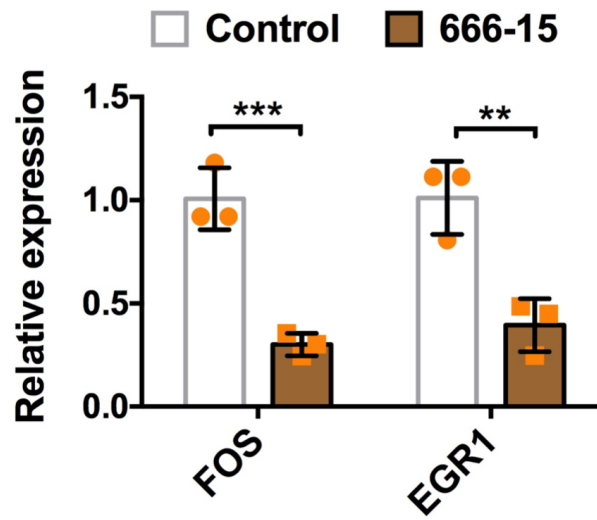

Supplementary Figure S3

Supplement: NIHMS1507063-supplement-4.pdf [file NIHMS1507063-supplement-4.pdf]

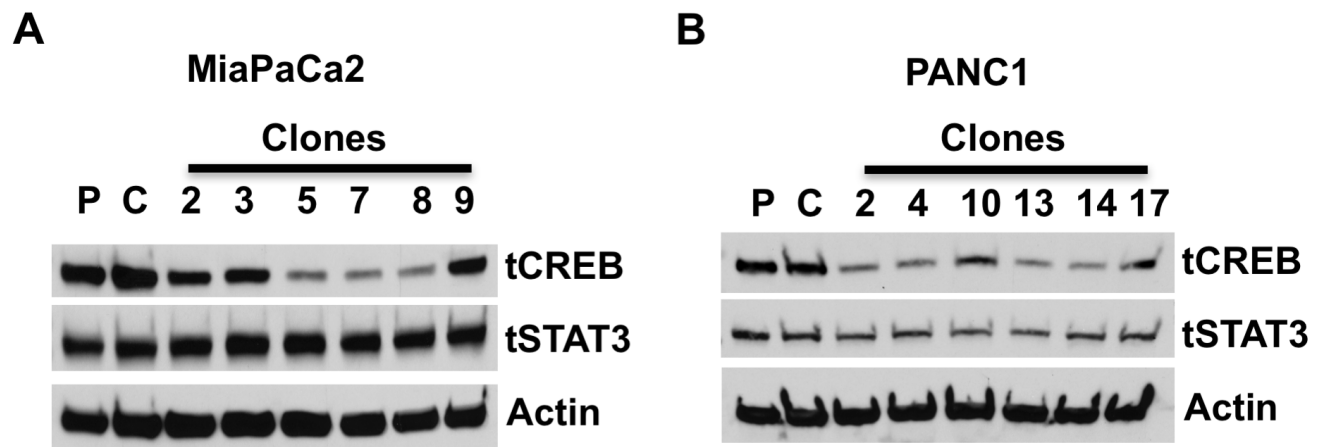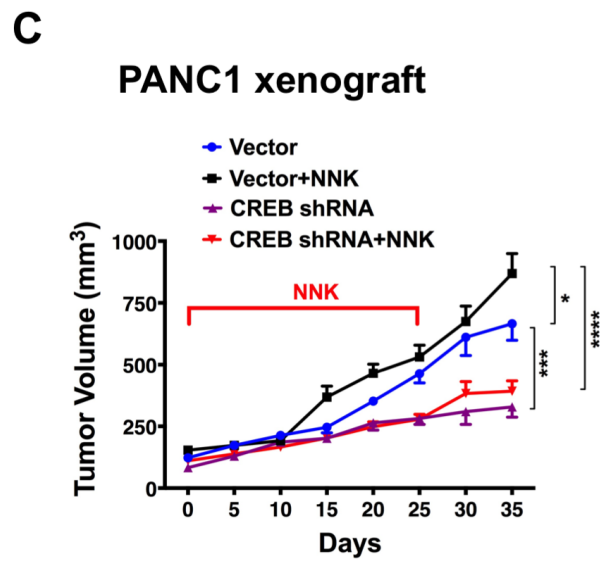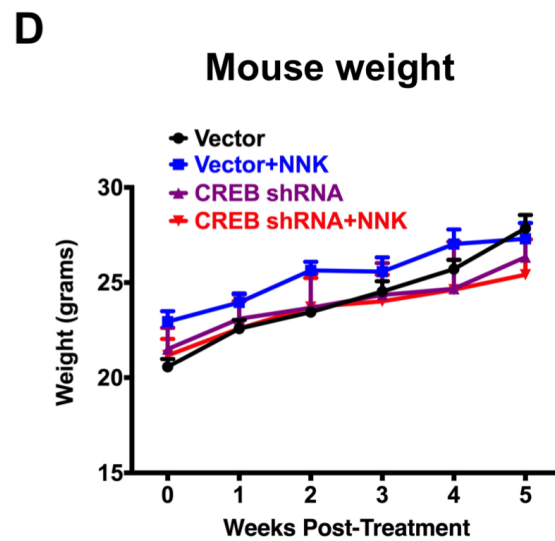

Supplementary Figure S4

Supplement: NIHMS1507063-supplement-5.pdf [file NIHMS1507063-supplement-5.pdf]

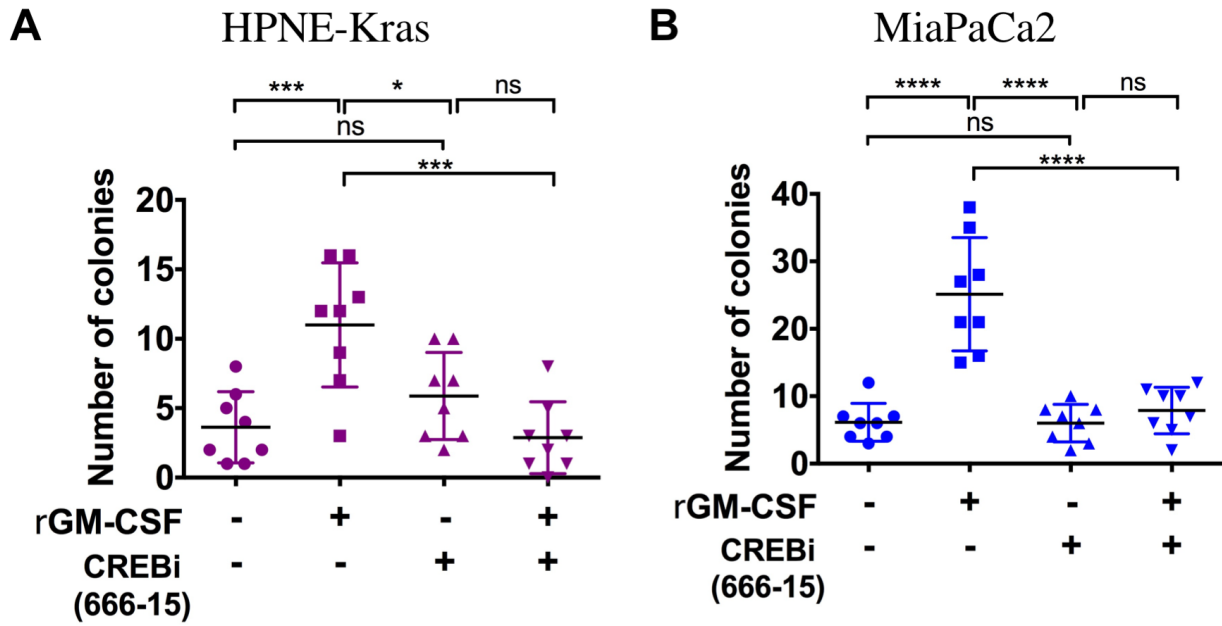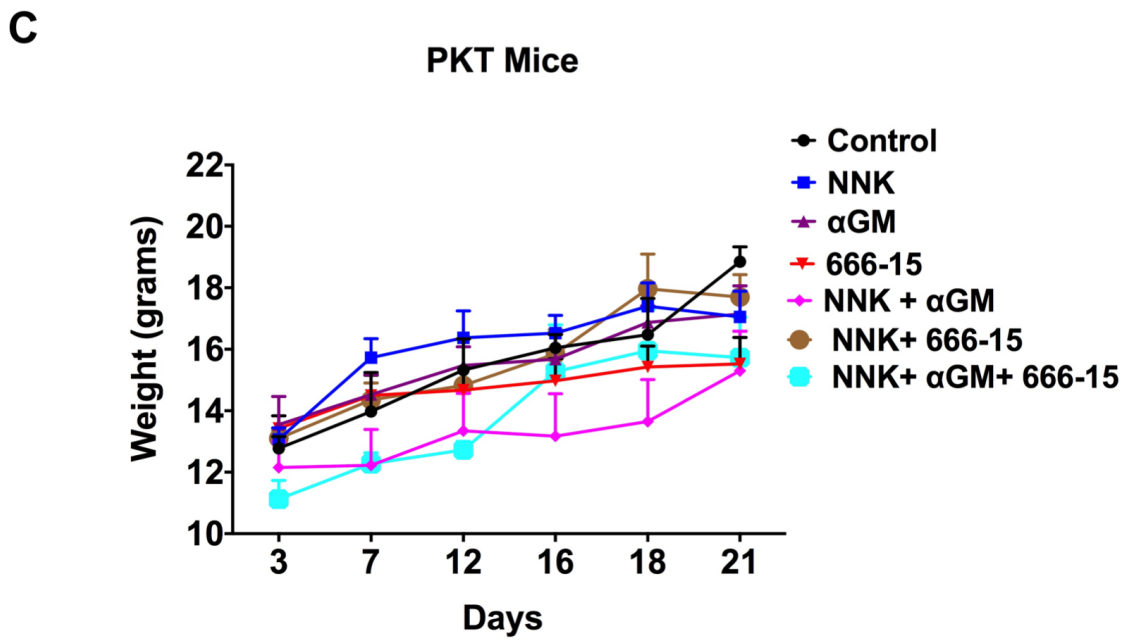

Supplementary Figure S6

Supplement: NIHMS1507063-supplement-7.pdf [file NIHMS1507063-supplement-7.pdf]
